# Supplementary material for: Highly efficient trans–cis isomerization of lycopene catalyzed by iodine-doped TiO2nanoparticles
Source: Royal Society of Chemistry journal article supplement (doi:10.1039/c5ra24074c), 2015-12-21
Supplement: c5ra24074c1.pdf [file c5ra24074c1.pdf]

*Supporting information*

## Highly efficient trans-cis isomerization of lycopene catalyzed by iodine-doped TiO<sub>2</sub> nanoparticles

Qingrui Sun,<sup>ad</sup> Cheng Yang,<sup>b</sup> Jing Li,<sup>b</sup> Waleed Aboshora,<sup>b</sup> Husnain Raza<sup>b</sup> and Lianfu Zhang<sup>\*abc</sup>

<sup>a</sup> State Key Laboratory of Food Science and Technology, Wuxi 214122, China

<sup>b</sup> School of Food Science and Technology, Jiangnan University, Wuxi 214122, China

<sup>c</sup> National Engineering Research Center for Functional Food, Wuxi 214122, China

<sup>d</sup> School of Food Science and Technology, Bayi Agricultural University, Daqing 163319, China

\* Corresponding author: Prof. Lianfu Zhang

E-mail: [lianfu@jiangnan.edu.cn](mailto:lianfu@jiangnan.edu.cn) (L. Zhang).

Tel. /fax: +86 510 85917081

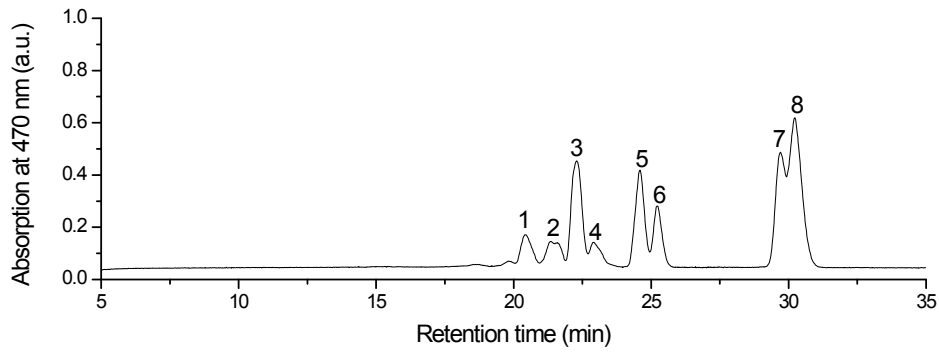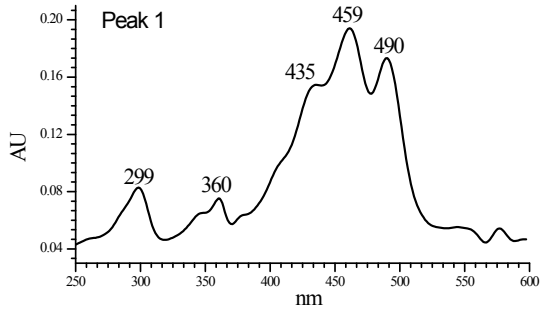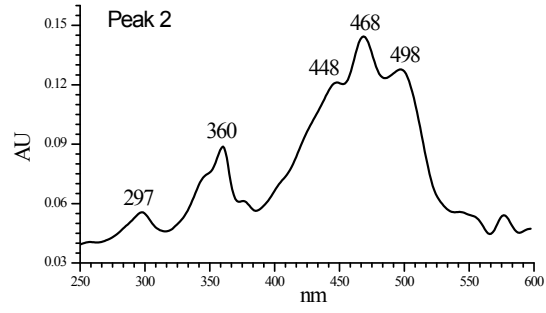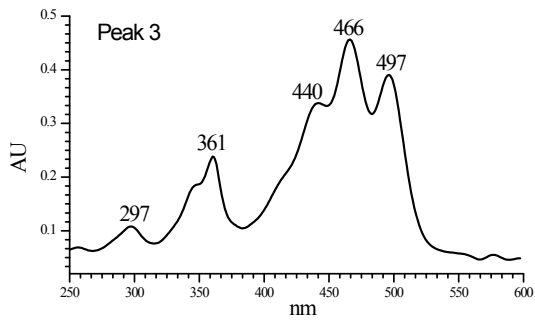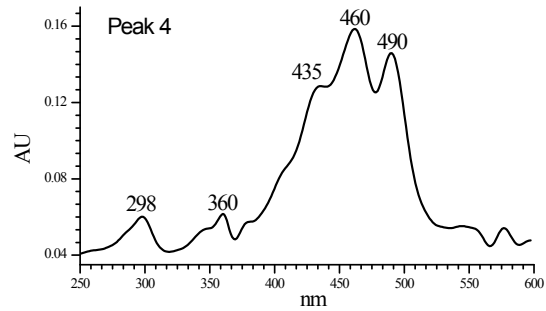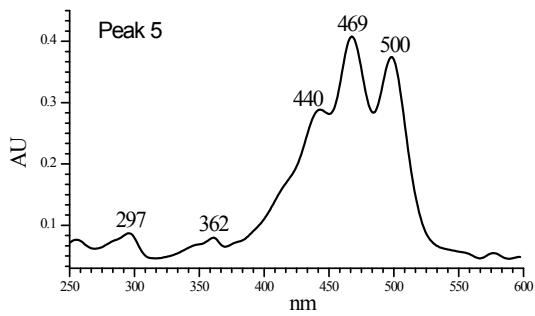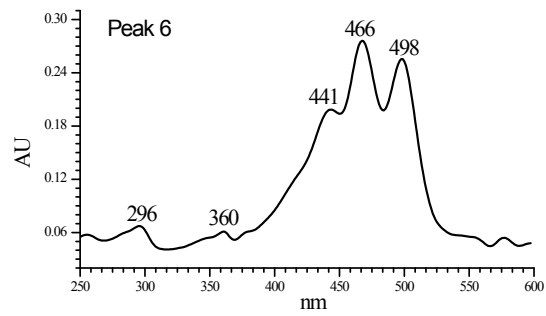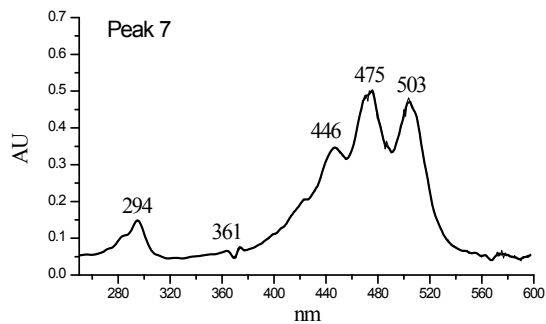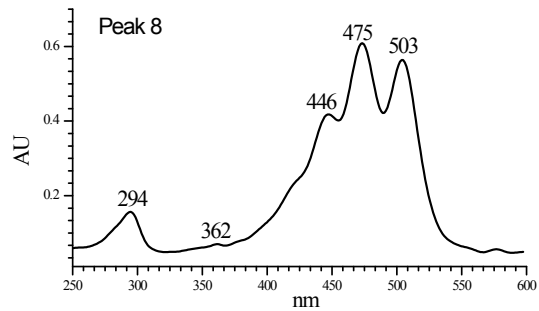

**Figure S1** HPLC chromatogram and UV/vis spectra of an isomerised *all-trans*-lycopene catalyzed by I-TiO<sub>2</sub>: peaks 1-6, peak 8 are *cis* isomeric lycopene, peak 7 is *all-trans*- lycopene.

**Table S1** Identification data for lycopene isomers

| peak | isomers  | Retention<br>min | $\lambda_{\max}$ (In line) |     |     |     | $\lambda_{\max}$ (Report) |     |     |     | Q*        |                   |
|------|----------|------------------|----------------------------|-----|-----|-----|---------------------------|-----|-----|-----|-----------|-------------------|
|      |          |                  | nm                         |     |     |     | nm                        |     |     |     | calculate | Report            |
| 1    | isomer 1 | 20.43            | 360                        | 435 | 459 | 490 |                           |     |     |     | 0.38      |                   |
| 2    | isomer 2 | 21.36            | 360                        | 448 | 468 | 498 |                           |     |     |     | 0.61      |                   |
| 3    | 13Z      | 22.30            | 361                        | 440 | 466 | 497 | 361                       | 437 | 463 | 494 | 0.52      | 0.52 <sup>a</sup> |
| 4    | isomer 4 | 22.91            | 360                        | 435 | 460 | 490 |                           |     |     |     | 0.38      |                   |
| 5    | 9Z       | 24.59            | 362                        | 440 | 469 | 500 | 361                       | 440 | 467 | 496 | 0.20      | 0.20 <sup>b</sup> |
| 6    | 5Z,9Z    | 25.22            | 360                        | 441 | 466 | 498 | 361                       | 440 | 467 | 496 | 0.22      | 0.19 <sup>b</sup> |
| 7    | all-E    | 30.01            | 361                        | 446 | 475 | 503 | 365                       | 446 | 473 | 503 | 0.12      | 0.11 <sup>b</sup> |
| 8    | 5Z       | 30.22            | 362                        | 446 | 475 | 503 | 361                       | 446 | 472 | 503 | 0.11      | 0.11 <sup>b</sup> |

<sup>a</sup> Identified according to previous work <sup>1</sup>. <sup>b</sup> Identified according to previous work <sup>2</sup>.

\* Ratio of absorption intensity ( $D_B$ ) at the near-UV maxima (360–362 nm) to absorption intensity ( $D_{II}$ ) at the main absorption maximum (459–476 nm).

## References

1. M. Honda, N. Takahashi, T. Kuwa, M. Takehara, Y. Inoue and T. Kumagai, *Food Chem*, 2015, **171**, 323-329.
2. A. J. Melendez-Martinez, M. Paulino, C. M. Stinco, P. Mapelli-Brahm and X. D. Wang, *J Agric Food Chem*, 2014, **62**, 12399-12406.
